# Supplementary material for: Modeling neutral viral mutations in the spread of SARS-CoV-2 epidemics
Source: PubMed Central journal article supplement (PMC8321105; doi:10.1371/journal.pone.0255438), 2021-07-29
Supplement: pone.0255438.s002.pdf [file pone.0255438.s002.pdf]

**S1 Table. All Chinese genome sequences.** All genomes registered in Wolfram Repository “Genetic Sequences for the SARS-CoV-2 Coronavirus” with complete *NucleotideStatus* and human *Host* from China (data accessed 19/08/2020) [1].

| Accession Number | Collection Date | Length | Geographic Location  | Included? | Justification                                                          |
|------------------|-----------------|--------|----------------------|-----------|------------------------------------------------------------------------|
| MN908947         | 26 Dec 2019*    | 29903  | Wuhan, Hubei**       | Y         |                                                                        |
| MN938384         | 10 Jan 2020     | 29838  | Shenzen, Guangdong   | Y         |                                                                        |
| MN975262         | 11 Jan 2020     | 29891  | Wuhan, Hubei**       | Y         |                                                                        |
| MN988668         | 02 Jan 2020     | 29881  | Wuhan, Hubei**       | Y         |                                                                        |
| MN988669         | 02 Jan 2020     | 29881  | Wuhan, Hubei**       | Y         |                                                                        |
| MN996527         | 30 Dec 2019     | 29825  | Wuhan, Hubei         | Y         |                                                                        |
| MN996528         | 30 Dec 2019     | 29891  | Wuhan, Hubei         | Y         |                                                                        |
| MN996529         | 30 Dec 2019     | 29852  | Wuhan, Hubei         | Y         |                                                                        |
| MN996530         | 30 Dec 2019     | 29854  | Wuhan, Hubei         | Y         |                                                                        |
| MN996531         | 30 Dec 2019     | 29857  | Wuhan, Hubei         | Y         |                                                                        |
| MT019529         | 23 Dec 2019     | 29899  | Wuhan, Hubei         | Y         |                                                                        |
| MT019530         | 30 Dec 2019     | 29889  | Wuhan, Hubei         | N         | MT19530 to MT19532: Might be biased data (sequences from the same      |
| MT019531         | 30 Dec 2019     | 29899  | Wuhan, Hubei         | N         | researchers, collected at the same day and with quite the same length, |
| MT019532         | 30 Dec 2019     | 29890  | Wuhan, Hubei         | N         | with no other informations up to the date we have made the analysis).* |
| MT019533         | 01 Jan 2020     | 29883  | Wuhan, Hubei         | Y         |                                                                        |
| MT034054         | 03 Jan 2020     | 29885  | Beijing              | Y         |                                                                        |
| MT039873         | 20 Jan 2020     | 29833  | Hangzhou, Zhejiang   | Y         |                                                                        |
| MT039874         | 22 Jan 2020     | 29858  | Hangzhou, Zhejiang** | Y         |                                                                        |
| MT049951         | 17 Jan 2020     | 29903  | Kunming, † Yunnan    | Y         |                                                                        |
| MT079843         | 22 Jan 2020     | 29915  | Wuhan, Hubei**       | Y         | MT079843 to MT079854: Might be biased data (probable nosocomial        |
| MT079844         | 22 Jan 2020     | 29910  | Wuhan, Hubei**       | N         | transmission).**                                                       |
| MT079845         | 22 Jan 2020     | 29955  | Wuhan, Hubei**       | N         | Then we have included only one genome.                                 |
| MT079846         | 22 Jan 2020     | 29903  | Wuhan, Hubei**       | N         |                                                                        |
| MT079847         | 22 Jan 2020     | 29872  | Wuhan, Hubei**       | N         |                                                                        |
| MT079848         | 22 Jan 2020     | 29880  | Wuhan, Hubei**       | N         |                                                                        |
| MT079849         | 22 Jan 2020     | 29904  | Wuhan, Hubei**       | N         |                                                                        |
| MT079850         | 22 Jan 2020     | 29885  | Wuhan, Hubei**       | N         |                                                                        |
| MT079851         | 22 Jan 2020     | 30018  | Wuhan, Hubei**       | N         |                                                                        |
| MT079852         | 22 Jan 2020     | 29891  | Wuhan, Hubei**       | N         |                                                                        |
| MT079853         | 22 Jan 2020     | 29766  | Wuhan, Hubei**       | N         |                                                                        |
| MT079854         | 22 Jan 2020     | 29897  | Wuhan, Hubei**       | N         |                                                                        |
| MT093631         | 08 Jan 2020     | 29860  | Beijing†             | N         | No detailed geographic information available.                          |
| MT121215         | 02 Feb 2020     | 29945  | Shanghai             | Y         |                                                                        |

|          |             |       |                      |   |                                                                                                      |
|----------|-------------|-------|----------------------|---|------------------------------------------------------------------------------------------------------|
| MT123290 | 05 Feb 2020 | 29891 | Guangzhou, Guangdong | Y |                                                                                                      |
| MT123291 | 29 Jan 2020 | 29882 | Guangzhou, Guangdong | Y |                                                                                                      |
| MT123292 | 27 Jan 2020 | 29923 | Guangzhou, Guangdong | Y |                                                                                                      |
| MT123293 | 29 Jan 2020 | 29871 | Guangzhou, Guangdong | Y |                                                                                                      |
| MT135041 | 26 Jan 2020 | 29903 | Beijing              | N | MT135041 to MT135044: Might be biased data (the lengths are all the same).                           |
| MT135042 | 28 Jan 2020 | 29903 | Beijing              | N |                                                                                                      |
| MT135043 | 28 Jan 2020 | 29903 | Beijing              | N | Then we have included only one genome                                                                |
| MT135044 | 28 Jan 2020 | 29903 | Beijing              | Y |                                                                                                      |
| MT226610 | 20 Jan 2020 | 29899 | Kunming, Yunnan†     | N | No detailed geographic information available.                                                        |
| MT253696 | 23 Jan 2020 | 29781 | Hangzhou, Zhejiang   | N | MT253696 to MT253710: Might be biased data (cluster of cases*); also they all have the same length). |
| MT253697 | 23 Jan 2020 | 29781 | Hangzhou, Zhejiang   | N |                                                                                                      |
| MT253698 | 23 Jan 2020 | 29781 | Hangzhou, Zhejiang   | N | Then we have included only one genome.                                                               |
| MT253699 | 24 Jan 2020 | 29781 | Hangzhou, Zhejiang   | N |                                                                                                      |
| MT253700 | 25 Jan 2020 | 29781 | Hangzhou, Zhejiang   | N |                                                                                                      |
| MT253701 | 21 Jan 2020 | 29781 | Hangzhou, Zhejiang   | N |                                                                                                      |
| MT253702 | 21 Jan 2020 | 29781 | Hangzhou, Zhejiang   | N |                                                                                                      |
| MT253703 | 25 Jan 2020 | 29781 | Hangzhou, Zhejiang   | N |                                                                                                      |
| MT253704 | 25 Jan 2020 | 29781 | Hangzhou, Zhejiang   | N |                                                                                                      |
| MT253705 | 22 Jan 2020 | 29781 | Hangzhou, Zhejiang   | N |                                                                                                      |
| MT253706 | 22 Jan 2020 | 29781 | Hangzhou, Zhejiang   | N |                                                                                                      |
| MT253707 | 25 Jan 2020 | 29781 | Hangzhou, Zhejiang   | N |                                                                                                      |
| MT253708 | 21 Jan 2020 | 29781 | Hangzhou, Zhejiang   | N |                                                                                                      |
| MT253709 | 21 Jan 2020 | 29781 | Hangzhou, Zhejiang   | N |                                                                                                      |
| MT253710 | 21 Jan 2020 | 29781 | Hangzhou, Zhejiang   | Y |                                                                                                      |
| MT259226 | 10 Jan 2020 | 29868 | Wuhan, Hubei         | Y |                                                                                                      |
| MT259227 | 26 Jan 2020 | 29863 | Wuhan, Hubei         | Y |                                                                                                      |
| MT259228 | 26 Jan 2020 | 29861 | Wuhan, Hubei         | Y |                                                                                                      |
| MT259229 | 26 Jan 2020 | 29864 | Wuhan, Hubei         | Y |                                                                                                      |
| MT259230 | 25 Jan 2020 | 29866 | Wuhan, Hubei         | Y |                                                                                                      |
| MT259231 | 25 Jan 2020 | 29865 | Wuhan, Hubei         | Y |                                                                                                      |
| MT281577 | 10 Mar 2020 | 29903 | Fujiyang, Anhui      | Y |                                                                                                      |
| MT291826 | 30 Dec 2019 | 29807 | Wuhan, Hubei         | Y |                                                                                                      |
| MT291827 | 30 Dec 2019 | 29858 | Wuhan, Hubei         | Y |                                                                                                      |
| MT291828 | 30 Dec 2019 | 29858 | Wuhan, Hubei         | Y |                                                                                                      |
| MT291829 | 30 Dec 2019 | 29774 | Wuhan, Hubei         | Y |                                                                                                      |
| MT291830 | 30 Dec 2019 | 29807 | Wuhan, Hubei         | Y |                                                                                                      |
| MT291831 | 24 Jan 2020 | 29872 | Beijing              | Y |                                                                                                      |
| MT291832 | 25 Jan 2020 | 29828 | Beijing              | Y |                                                                                                      |
