# Supplementary material for: Modeling neutral viral mutations in the spread of SARS-CoV-2 epidemics
Source: PubMed Central journal article supplement (PMC8321105; doi:10.1371/journal.pone.0255438), 2021-07-29
Supplement: pone.0255438.s003.pdf [file pone.0255438.s003.pdf]

**S2 Table. Included sequences sorted by Collection Date.** All informations according to S1 Table.

| Number | Accession Number | Collection Date | Length | Geographic Location  |
|--------|------------------|-----------------|--------|----------------------|
| #1     | MT019529         | 23 Dec 2019     | 29899  | Wuhan, Hubei         |
| #2     | MN908947         | 26 Dec 2019     | 29903  | Wuhan, Hubei         |
| #3     | MT291829         | 30 Dec 2019     | 29774  | Wuhan, Hubei         |
| #4     | MT291826         | 30 Dec 2019     | 29807  | Wuhan, Hubei         |
| #5     | MT291830         | 30 Dec 2019     | 29807  | Wuhan, Hubei         |
| #6     | MN996527         | 30 Dec 2019     | 29825  | Wuhan, Hubei         |
| #7     | MN996529         | 30 Dec 2019     | 29852  | Wuhan, Hubei         |
| #8     | MN996530         | 30 Dec 2019     | 29854  | Wuhan, Hubei         |
| #9     | MN996531         | 30 Dec 2019     | 29857  | Wuhan, Hubei         |
| #10    | MT291827         | 30 Dec 2019     | 29858  | Wuhan, Hubei         |
| #11    | MT291828         | 30 Dec 2019     | 29858  | Wuhan, Hubei         |
| #12    | MN996528         | 30 Dec 2019     | 29891  | Wuhan, Hubei         |
| #13    | MT019533         | 01 Jan 2020     | 29883  | Wuhan, Hubei         |
| #14    | MN988668         | 02 Jan 2020     | 29881  | Wuhan, Hubei         |
| #15    | MN988669         | 02 Jan 2020     | 29881  | Wuhan, Hubei         |
| #16    | MT034054         | 03 Jan 2020     | 29885  | Beijing              |
| #17    | MN938384         | 10 Jan 2020     | 29838  | Shenzhen, Guangdong  |
| #18    | MT259226         | 10 Jan 2020     | 29868  | Wuhan, Hubei         |
| #19    | MN975262         | 11 Jan 2020     | 29891  | Wuhan, Hubei         |
| #20    | MT049951         | 17 Jan 2020     | 29903  | Yunnan               |
| #21    | MT039873         | 20 Jan 2020     | 29833  | Hangzhou, Zhejiang   |
| #22    | MT253710         | 21 Jan 2020     | 29781  | Hangzhou, Zhejiang   |
| #23    | MT407650         | 22 Jan 2020     | 29821  | Zhejiang             |
| #24    | MT407651         | 22 Jan 2020     | 29822  | Zhejiang             |
| #25    | MT407649         | 22 Jan 2020     | 29833  | Zhejiang             |
| #26    | MT039874         | 22 Jan 2020     | 29858  | Hangzhou, Zhejiang   |
| #27    | MT079843         | 22 Jan 2020     | 29915  | Wuhan, Hubei         |
| #28    | MT291831         | 24 Jan 2020     | 29872  | Beijing              |
| #29    | MT291832         | 25 Jan 2020     | 29828  | Beijing              |
| #30    | MT259231         | 25 Jan 2020     | 29865  | Wuhan, Hubei         |
| #31    | MT259230         | 25 Jan 2020     | 29866  | Wuhan, Hubei         |
| #32    | MT407652         | 26 Jan 2020     | 29835  | Zhejiang             |
| #33    | MT407653         | 26 Jan 2020     | 29835  | Zhejiang             |
| #34    | MT534630         | 26 Jan 2020     | 29845  | Changzhou, Jiangsu   |
| #35    | MT259228         | 26 Jan 2020     | 29861  | Wuhan, Hubei         |
| #36    | MT259227         | 26 Jan 2020     | 29863  | Wuhan, Hubei         |
| #37    | MT259229         | 26 Jan 2020     | 29864  | Wuhan, Hubei         |
| #38    | MT291835         | 27 Jan 2020     | 29834  | Beijing              |
| #39    | MT123292         | 27 Jan 2020     | 29923  | Guangzhou, Guangdong |
| #40    | MT291833         | 28 Jan 2020     | 29821  | Beijing              |
| #41    | MT291834         | 28 Jan 2020     | 29865  | Beijing              |
| #42    | MT135044         | 28 Jan 2020     | 29903  | Beijing              |
| #43    | MT291836         | 29 Jan 2020     | 29860  | Beijing              |
| #44    | MT123293         | 29 Jan 2020     | 29871  | Guangzhou, Guangdong |
| #45    | MT123291         | 29 Jan 2020     | 29882  | Guangzhou, Guangdong |
| #46    | MT121215         | 02 Feb 2020     | 29945  | Shanghai             |
| #47    | MT446312         | 05 Feb 2020     | 29879  | Guangzhou, Guangdong |
| #48    | MT123290         | 05 Feb 2020     | 29891  | Guangzhou, Guangdong |
| #49    | MT281577         | 10 Mar 2020     | 29903  | Fuyang, Anhui        |
| #50    | MT407658         | 24 Mar 2020     | 29770  | Zhejiang             |
| #51    | MT407657         | 24 Mar 2020     | 29776  | Zhejiang             |
| #52    | MT407654         | 24 Mar 2020     | 29817  | Zhejiang             |
| #53    | MT407655         | 24 Mar 2020     | 29817  | Zhejiang             |
| #54    | MT407659         | 24 Mar 2020     | 29828  | Zhejiang             |
| #55    | MT407656         | 24 Mar 2020     | 29835  | Zhejiang             |
