# Supplementary material for: Modeling neutral viral mutations in the spread of SARS-CoV-2 epidemics
Source: PubMed Central journal article supplement (PMC8321105; doi:10.1371/journal.pone.0255438), 2021-07-29
Supplement: pone.0255438.s004.pdf [file pone.0255438.s004.pdf]

**S3 Table. Genome information used to calculate points in Fig.5.** We have used a 14 days time window, i. e., every sequenced genome within an interval of 14 days were considered as infected ones, while the previous were considered to be recovered.

| Point Number* | Infected Genomes | Recovered Genomes | Date Interval             |
|---------------|------------------|-------------------|---------------------------|
| #1            | #03 → #19        | #1 → #02          | 30 Dec 2019 → 12 Jan 2020 |
| #2            | #13 → #19        | #1 → #12          | 01 Jan 2020 → 14 Jan 2020 |
| #3            | #14 → #19        | #1 → #13          | 02 Jan 2019 → 15 Jan 2020 |
| #4            | #16 → #19        | #1 → #15          | 03 Jan 2019 → 16 Jan 2020 |
| #5            | #17 → #27        | #1 → #16          | 10 Jan 2019 → 23 Jan 2020 |
| #6            | #19 → #28        | #1 → #18          | 11 Jan 2019 → 24 Jan 2020 |
| #7            | #20 → #45        | #1 → #19          | 17 Jan 2019 → 30 Jan 2020 |
| #8            | #21 → #46        | #1 → #20          | 20 Jan 2019 → 02 Feb 2020 |
| #9            | #22 → #46        | #1 → #21          | 21 Jan 2019 → 03 Feb 2020 |
| #10           | #23 → #46        | #1 → #22          | 22 Jan 2019 → 04 Feb 2020 |
| #11           | #28 → #48        | #1 → #27          | 24 Jan 2019 → 06 Feb 2020 |
| #12           | #29 → #48        | #1 → #28          | 25 Jan 2019 → 07 Feb 2020 |
| #13           | #32 → #48        | #1 → #31          | 26 Jan 2019 → 08 Feb 2020 |
| #14           | #38 → #48        | #1 → #37          | 27 Jan 2019 → 09 Feb 2020 |
| #15           | #40 → #48        | #1 → #39          | 28 Jan 2019 → 10 Feb 2020 |
| #16           | #43 → #48        | #1 → #42          | 29 Jan 2019 → 11 Feb 2020 |
| #17           | #46 → #48        | #1 → #45          | 02 Feb 2019 → 15 Feb 2020 |
| #18           | #47 → #48        | #1 → #46          | 05 Feb 2019 → 18 Feb 2020 |
| #19**         | #49 → #49        | #1 → #48          |                           |
| #20†          | #50 → #55        | #1 → #49          | 24 Mar 2019 → 06 Apr 2020 |

\*In Fig.4 from the main text, points are numbered from left to right.

\*\*Since there is only one genome in this time window, we cannot estimate a distance among the infected population, so genome #49 was not used.

† This point was not included in Fig.4 because it is lacking more than one month of genetic information between points #18 and #19, therefore the distance among the recovered population cannot be well inferred.
